# Supplementary material
Source: publisher site journal article supplement (https://www.dovepress.com/article/448004)
Supplement: Supplementary file 1 [file get_supplementary_file.php]

| Supplementary 1. Literature reviews on the predictive outcomes of the acute kidney injury requiring dialysis                                                            |                                          |                                                                                                                                                                                                                                                                                                                                     |                                                                                                                                                                                                        |                                                                                                                               |                                                                                                                                                                                    |                                      |
|-------------------------------------------------------------------------------------------------------------------------------------------------------------------------|------------------------------------------|-------------------------------------------------------------------------------------------------------------------------------------------------------------------------------------------------------------------------------------------------------------------------------------------------------------------------------------|--------------------------------------------------------------------------------------------------------------------------------------------------------------------------------------------------------|-------------------------------------------------------------------------------------------------------------------------------|------------------------------------------------------------------------------------------------------------------------------------------------------------------------------------|--------------------------------------|
| Title                                                                                                                                                                   | Sample Size                              | Input variables                                                                                                                                                                                                                                                                                                                     | Prediction models                                                                                                                                                                                      | Primary outcomes                                                                                                              | Best performance                                                                                                                                                                   | Reference                            |
| Predicting Renal Recovery After Dialysis- Requiring Acute Kidney Injury                                                                                                 | 2214 patients between 2009/1 and 2015/9  | 1. baseline eGFR <sup>a</sup><br>2. baseline hemoglobin level<br>3. history of chronic heart and liver disease<br>4. age<br>5. Proteinuria<br>6. Body mass index                                                                                                                                                                    | 1. Logistic regression model<br>2. Classification and regression tree                                                                                                                                  | 90-day dialysis dependence                                                                                                    | C-index = 0.64 (logistic regression)                                                                                                                                               | Lee, Hsu et al. 2019 [36]            |
| The Nutritional Risk Index as a Predictor of 90-Day Dialysis Dependence After Acute Renal Failure: A Pilot Study                                                        | 77 patients between 2015/1 and 2019/1    | 1. Nutritional Risk Index<br>2. age<br>3. serum total protein<br>4. number of vasopressor days<br>5. baseline predialysis eGFR <sup>a</sup><br>6. SOFA <sup>b</sup> score                                                                                                                                                           | Multiple logistic regression model                                                                                                                                                                     | 90-day dialysis dependence                                                                                                    | AUROC <sup>j</sup> = 0.889<br>Sensitivity = 56.3%<br>Specificity = 95%.                                                                                                            | Emuron, Thomas et al. 2023 [37]      |
| Outcome Prediction of Acute Kidney Injury Biomarkers at Initiation of Dialysis in Critical Units                                                                        | 257 patients between 2011/8 and 2015/1   | Plasma c-terminal FGF <sup>c</sup> -23                                                                                                                                                                                                                                                                                              | Multivariate generalized additive model                                                                                                                                                                | 90- day RRT <sup>d</sup> dependence and all-cause mortality after discharge                                                   | Mortality: AUROC <sup>j</sup> = 0.687                                                                                                                                              | Wu, Shiao et al. 2018 [38]           |
| Comparison of Approaches for Prediction of Renal Replacement Therapy-Free Survival in Patients with Acute Kidney Injury                                                 | 684 patients between 2001 and 2012       | A total of 81 features from hospital admission and up to CRRT <sup>e</sup> initiation were included into machine learning models                                                                                                                                                                                                    | 1. Logistic regression<br>2. Support vector machine<br>3. Adaptive boosting<br>4. Extreme gradient boosting<br>5. MLP <sup>f</sup><br>6. MLP <sup>f</sup> with LSTM <sup>g</sup><br>7. RF <sup>h</sup> | Dialysis independence for 7 days or more prior to hospital discharge                                                          | AUROC <sup>j</sup> = 0.70 (MLP <sup>f</sup> + LSTM <sup>g</sup> )                                                                                                                  | Pattharani ma, Vaid et al. 2021 [39] |
| Predicting successful continuous renal replacement therapy liberation in critically ill patients with acute kidney injury                                               | 1135 patients between 2007/1 and 2018/5  | 1. mean hourly urine output within 12 h before liberation<br>2. mean serum creatinine value within 24 h before liberation<br>3. cumulative fluid balance from ICU <sup>i</sup> admission to liberation<br>4. CRRT <sup>e</sup> duration before liberation<br>5. the requirement of vasoactive agents within 24 h before liberation. | Multivariate logistic regression models                                                                                                                                                                | Successful CRRT <sup>e</sup> liberation:<br>1. within 72 hours after the first liberation attempt<br>2. at hospital discharge | First attempt:<br>AUROC <sup>j</sup> = 0.76<br>Sensitivity = 65.3%<br>Specificity = 78%.<br>At discharge:<br>AUROC <sup>j</sup> = 0.78<br>Sensitivity = 93%,<br>Specificity = 53%. | Liu, Peng et al. 2021 [40]           |
| Machine learning algorithm to predict mortality in patients undergoing continuous renal replacement therapy                                                             | 1571 patients between 2010/7 and 2016/12 | A total of 30 features including baseline characteristics, vital signs and laboratory data                                                                                                                                                                                                                                          | 1. k-nearest neighbor<br>2. Support vector machine<br>3. Multivariate adaptive regression splines<br>4. RF <sup>h</sup><br>5. Extreme gradient boost<br>6. Artificial neural network                   | Mortality during:<br>1. ICU <sup>i</sup><br>2. hospital                                                                       | ICU <sup>i</sup> :<br>AUROC <sup>j</sup> = 0.784 (RF)<br>Hospital:<br>AUROC <sup>j</sup> = 0.768 (RF)                                                                              | Kang, Kim et al. 2020 [41]           |
| Predicting mortality among critically ill patients with acute kidney injury treated with renal replacement therapy: Development and validation of new prediction models | 594 patients between 2007/4 and 2014/12  | 1. baseline eGFR <sup>a</sup><br>2. systolic blood pressure<br>3. 24h urine output<br>4. serum creatinine at RRT <sup>d</sup> initiation<br>5. platelet count<br>6. cumulative fluid balance at RRT <sup>d</sup> initiation                                                                                                         | Least absolute shrinkage and selection operator                                                                                                                                                        | 90- days RRT <sup>d</sup> dependence and mortality                                                                            | Mortality:<br>AUROC <sup>j</sup> = 0.61<br>Dependence:<br>AUROC <sup>j</sup> = 0.64                                                                                                | Li, Wald et al. 2020 [42]            |

<sup>a</sup>eGFR: estimated glomerular filtration rate. <sup>b</sup>SOFA: sequential organ failure assessment. <sup>c</sup>FGF: fibroblast growth factor. <sup>d</sup>RRT: renal replacement therapy. <sup>e</sup>CRRT: continuous renal replacement therapy. <sup>f</sup>MLP: multilayer perceptron. <sup>g</sup>LSTM: long short-term memory. <sup>h</sup>RF: random forest. <sup>i</sup>ICU: intensive care unit. <sup>j</sup>AUROC: area under the receiver operating characteristic curve.

Supplementary 2. Timeframe of the patient selection in dialysis dependent module

- <Start of accrual>  
The index date when the patient underwent the first hospitalized dialysis
- ◆ <End of accrual>  
Observation time (90 days) after the index date
- ▲ <End of follow-up>  
Observation time (30 days) after the end of accrual

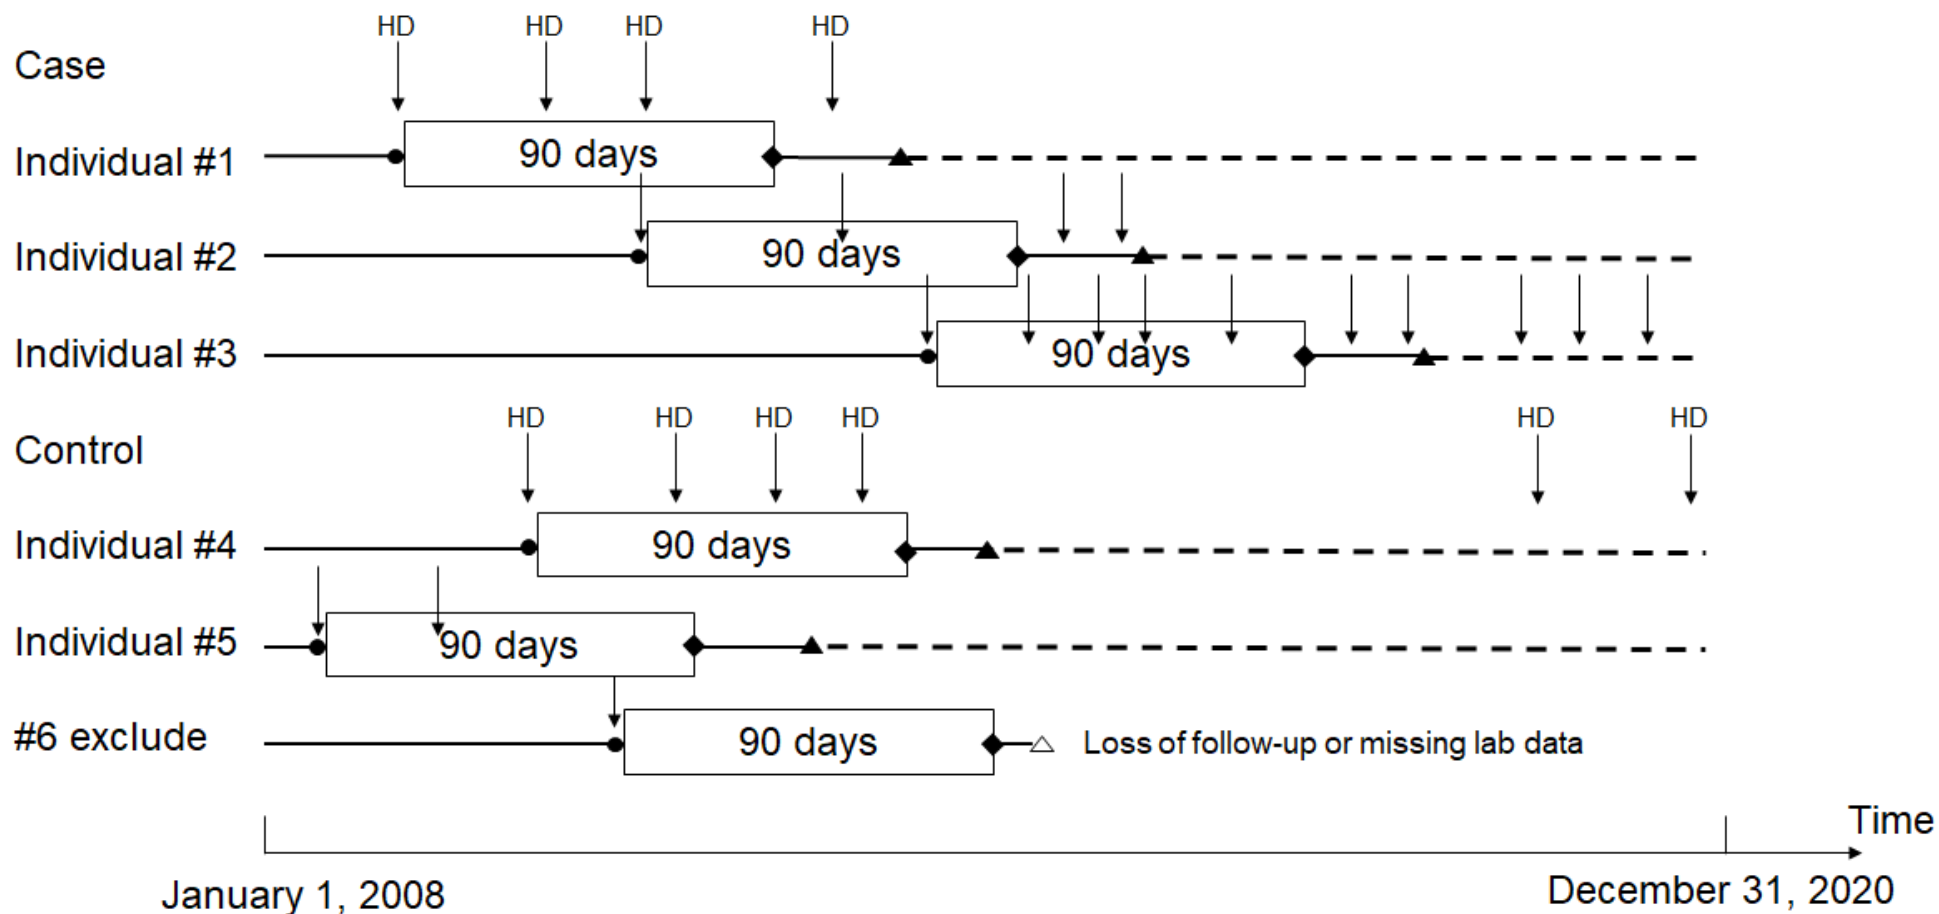

The symbol # indicates the number sign.

Supplementary 3. Timeframe of the patient selection in survival module

- <Start of accrual>  
The index date when the patient underwent the first hospitalized dialysis
- ◆ <End of accrual>  
Observation time (90 days) after the index date
- ▲ <End of follow-up>  
Observation time (30 days) after the end of accrual

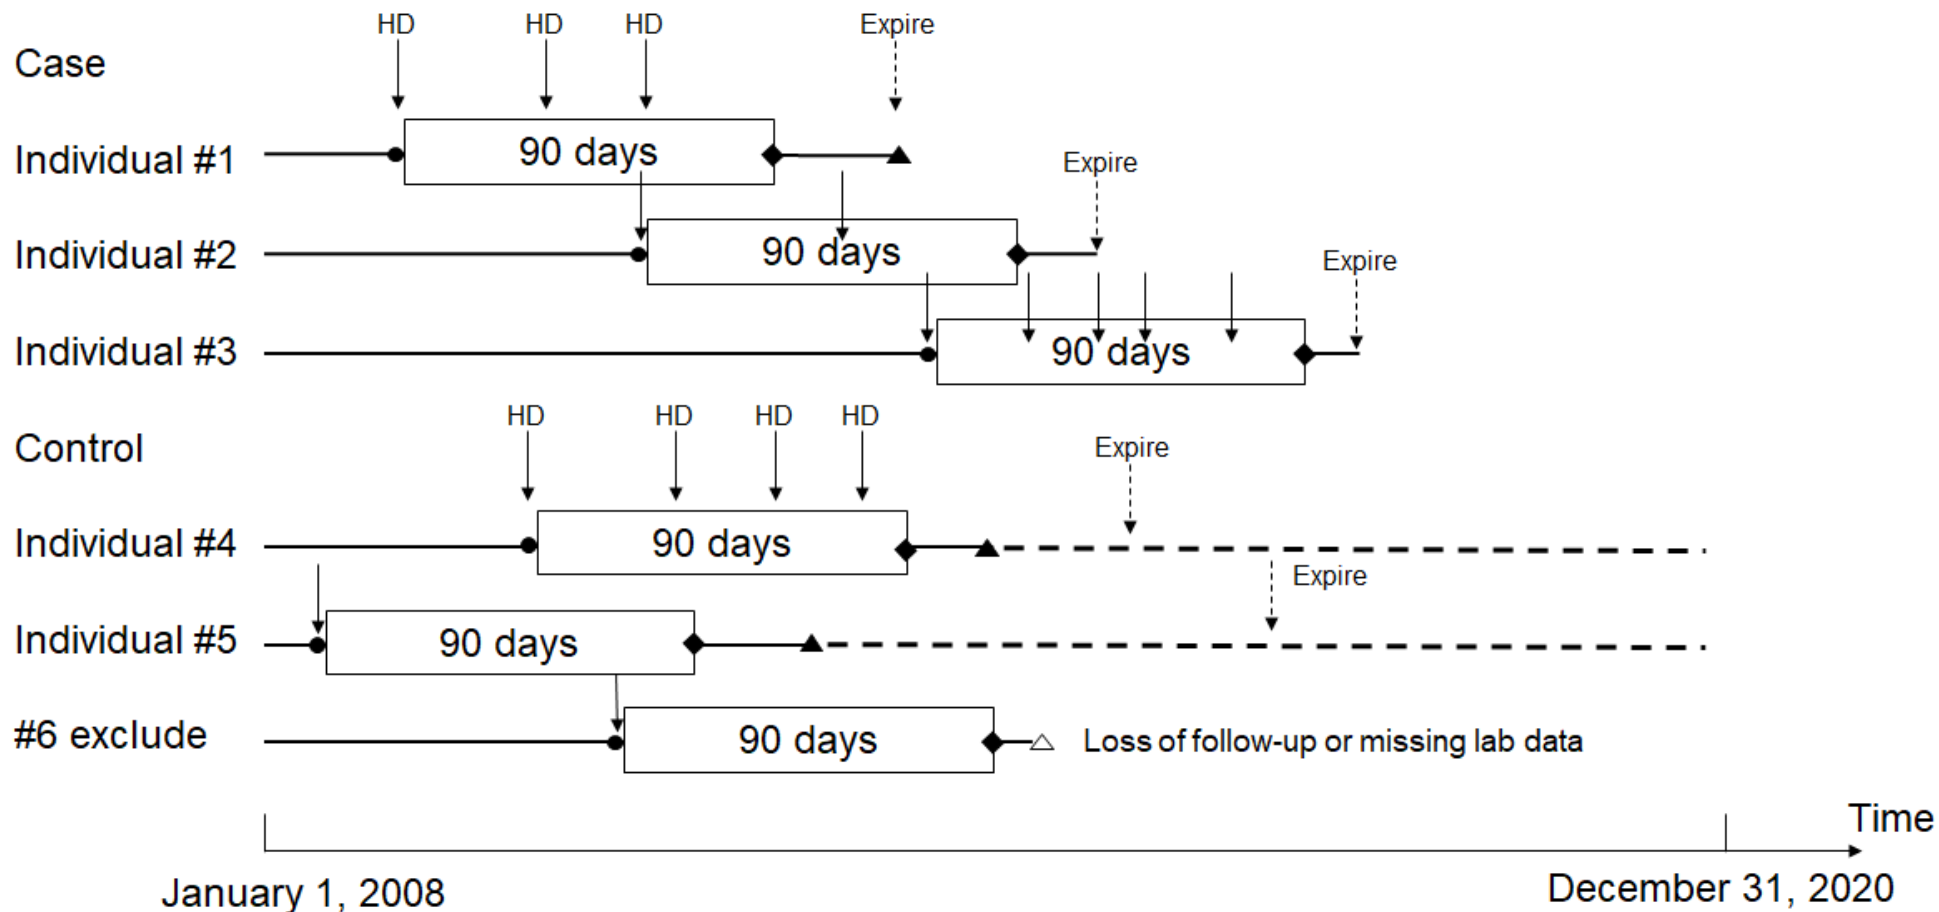

The symbol # indicates the number sign.

Supplementary 4. 5-fold cross-validation

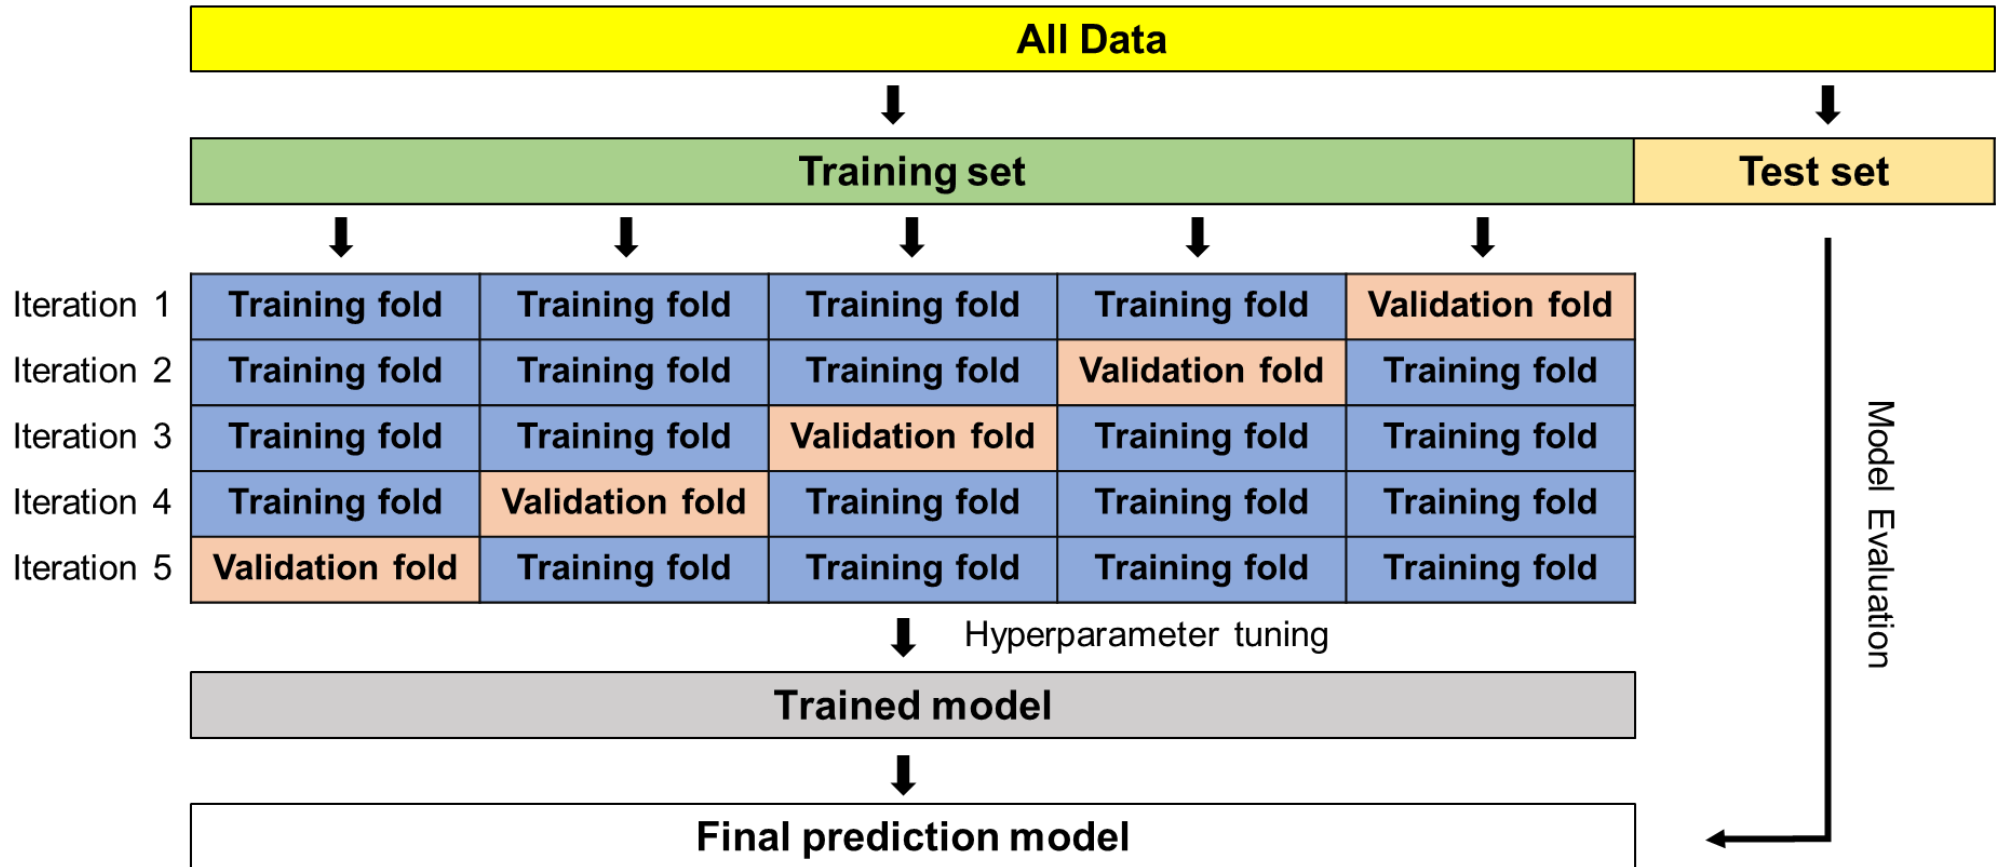

The use of the colored indicators is served for better visualization and interpretation.



Supplementary 6. Number of patients with missing values for laboratory test

|                                                      | 90-day dialysis dependence |         | 90-day survival |         |
|------------------------------------------------------|----------------------------|---------|-----------------|---------|
|                                                      | Case                       | Control | Case            | Control |
| No. of patients                                      | 616                        | 464     | 984             | 1374    |
| No. of patients with missing values for each feature |                            |         |                 |         |
| Creatinine_baseline                                  | 0                          | 0       | 0               | 0       |
| Creatinine_pre                                       | 0                          | 0       | 0               | 0       |
| Creatinine_post                                      | 0                          | 0       | NA              | NA      |
| Creatinine_pre_baseline_diff <sup>a</sup>            | 0                          | 0       | 0               | 0       |
| Creatinine_post_baseline_diff <sup>a</sup>           | 0                          | 0       | NA              | NA      |
| Creatinine_post_pre_diff <sup>a</sup>                | 0                          | 0       | NA              | NA      |
| eGFR <sup>b</sup> _baseline                          | 0                          | 0       | 0               | 0       |
| eGFR <sup>b</sup> _pre                               | 0                          | 0       | 0               | 0       |
| eGFR <sup>b</sup> _post                              | 0                          | 0       | NA              | NA      |
| eGFR <sup>b</sup> _pre_baseline_diff <sup>a</sup>    | 0                          | 0       | 0               | 0       |
| eGFR <sup>b</sup> _post_baseline_diff <sup>a</sup>   | 0                          | 0       | NA              | NA      |
| eGFR <sup>b</sup> _post_pre_diff <sup>a</sup>        | 0                          | 0       | NA              | NA      |
| BUN <sup>c</sup> _baseline                           | 0                          | 0       | 0               | 0       |
| BUN <sup>c</sup> _pre                                | 0                          | 0       | 0               | 0       |
| BUN <sup>c</sup> _post                               | 0                          | 0       | NA              | NA      |
| BUN <sup>c</sup> _pre_baseline_diff <sup>a</sup>     | 0                          | 0       | 0               | 0       |
| BUN <sup>c</sup> _post_baseline_diff <sup>a</sup>    | 0                          | 0       | NA              | NA      |
| BUN <sup>c</sup> _post_pre_diff <sup>a</sup>         | 0                          | 0       | NA              | NA      |
| Albumin_baseline                                     | 79                         | 133     | 348             | 280     |
| Albumin_pre                                          | 52                         | 62      | 51              | 168     |
| Albumin_post                                         | 40                         | 156     | NA              | NA      |
| Albumin_pre_baseline_diff <sup>a</sup>               | 120                        | 165     | 376             | 378     |
| Albumin_post_baseline_diff <sup>a</sup>              | 111                        | 241     | NA              | NA      |
| Albumin_post_pre_diff <sup>a</sup>                   | 83                         | 194     | NA              | NA      |
| Glucose_baseline                                     | 45                         | 42      | 113             | 118     |
| Glucose_pre                                          | 47                         | 23      | 66              | 94      |
| Glucose_pre_baseline_diff <sup>a</sup>               | 77                         | 59      | 160             | 187     |
| HGB <sup>d</sup> _baseline                           | 24                         | 33      | 52              | 71      |
| HGB <sup>d</sup> _pre                                | 2                          | 1       | 1               | 4       |
| HGB <sup>d</sup> _post                               | 0                          | 10      | NA              | NA      |
| HGB <sup>d</sup> _pre_baseline_diff <sup>a</sup>     | 25                         | 34      | 53              | 74      |
| HGB <sup>d</sup> _post_baseline_diff <sup>a</sup>    | 24                         | 42      | NA              | NA      |
| HGB <sup>d</sup> _post_pre_diff <sup>a</sup>         | 2                          | 10      | NA              | NA      |
| Uric_Acid_baseline                                   | 97                         | 147     | NA              | NA      |
| CRP <sup>e</sup> _pre                                | NA                         | NA      | 89              | 519     |
| Troponin_I_pre                                       | NA                         | NA      | 178             | 510     |
| CPK <sup>f</sup> _pre                                | NA                         | NA      | 183             | 484     |

<sup>a</sup>Diff: different; <sup>b</sup>eGFR: estimated glomerular filtration rate; <sup>c</sup>BUN: blood urea nitrogen; <sup>d</sup>HGB: hemoglobin; <sup>e</sup>CRP: C-reactive protein; <sup>f</sup>CPK: creatine phosphokinase; NA: Not applicable (Not collected for model training); Baseline: lab data tested beyond 90 days before index date; Pre: lab data tested within 90 days before the index date; Post: lab data tested within 2-8 weeks after the index date.
